# Supplementary material
Source: publisher site journal article supplement (https://www.degruyterbrill.com/publication/isbn/9783486594928/downloadAsset/9783486594928_Inhaltsverzeichnis.pdf)
Supplement: Supplementary file 1 [file 9783486594928_Inhaltsverzeichnis.pdf]

# Inhalt

|                                                                                      |            |
|--------------------------------------------------------------------------------------|------------|
| <b>Vorwort</b>                                                                       | <b>V</b>   |
| <b>Inhalt</b>                                                                        | <b>VII</b> |
| <b>1 Einleitung</b>                                                                  | <b>1</b>   |
| 1.1 Ausgangssituation und Motivation .....                                           | 1          |
| 1.1.1 Bessere Entwicklungsprozesse und bessere Produkte .....                        | 2          |
| 1.1.2 Steigerung der Produktqualität als primäres Ziel .....                         | 3          |
| 1.1.3 Bewertung als Basis für Verbesserung .....                                     | 4          |
| 1.2 Gegenstand und Ziele .....                                                       | 5          |
| 1.3 Methodik und Vorgehensweise .....                                                | 7          |
| 1.4 Aufbau des Buchs .....                                                           | 8          |
| <b>Teil I: Bewertung und Verbesserung von Entwicklungsprozessen und Technologien</b> | <b>11</b>  |
| <b>2 Stand der Technik und Praxis</b>                                                | <b>13</b>  |
| 2.1 Verfügbare Ansätze zur Bewertung von Softwareentwicklungsprozessen .....         | 13         |
| 2.1.1 Software Capability Maturity Model .....                                       | 15         |
| 2.1.2 Bootstrap-Methode .....                                                        | 18         |
| 2.1.3 Software Process Improvement and Capability dEtermination .....                | 20         |
| 2.1.4 Capability Maturity Model-Integrated .....                                     | 23         |
| 2.2 Bewertung des Technologiemanagements und der Technologieanwendung .....          | 26         |
| 2.3 Bewertung des Mitarbeitermanagements .....                                       | 26         |
| 2.4 Softwaremetriken und -messung .....                                              | 28         |
| 2.4.1 Goal/Question/Metric-Methode .....                                             | 29         |
| 2.4.2 Application of Metrics in Industry-Methode .....                               | 30         |
| 2.4.3 Perspektiven der Softwaremessung .....                                         | 31         |
| 2.5 Resümee und Folgerung .....                                                      | 32         |
| <b>3 Verbesserungsziele in der Softwareentwicklung</b>                               | <b>35</b>  |
| 3.1 Allgemeine Ziele der Verbesserung .....                                          | 35         |
| 3.1.1 Reduktion der Entwicklungskosten .....                                         | 37         |

|          |                                                                           |           |
|----------|---------------------------------------------------------------------------|-----------|
| 3.1.2    | Reduktion der Entwicklungszeit .....                                      | 38        |
| 3.1.3    | Qualitätssteigerung: Qualitätscharakteristiken des Softwareprodukts ..... | 38        |
| 3.1.4    | Reduktion der Softwarefehler .....                                        | 42        |
| 3.2      | Ermittlung unternehmensindividueller Verbesserungsziele .....             | 42        |
| <b>4</b> | <b>Bewertung des Software-Entwicklungsprozesses</b>                       | <b>45</b> |
| 4.1      | Einführung und Überblick über den Bewertungsablauf .....                  | 46        |
| 4.2      | Voranalyse .....                                                          | 47        |
| 4.2.1    | Identifikation der Verbesserungsziele .....                               | 47        |
| 4.2.2    | Bestimmung der Projekte .....                                             | 48        |
| 4.2.3    | Studium der Entwicklungsdokumente .....                                   | 48        |
| 4.3      | Ermittlung des aktuellen Prozessstatus .....                              | 49        |
| 4.3.1    | Qualitative Prozessanalyse .....                                          | 51        |
| 4.3.2    | Eingeschränkte quantitative Prozessanalyse .....                          | 55        |
| 4.3.3    | Erweiterte quantitative Prozessanalyse .....                              | 58        |
| 4.4      | Auswertung der Ergebnisse .....                                           | 62        |
| 4.4.1    | Visualisierung des Prozessstatus .....                                    | 62        |
| 4.4.2    | Definition von Verbesserungsmaßnahmen .....                               | 64        |
| 4.4.3    | Identifikation der Verbesserungstreiber .....                             | 64        |
| 4.4.4    | Definition von Metriken zur Kontrolle der Zielerreichung .....            | 65        |
| 4.5      | Dokumentation der Bewertungsergebnisse .....                              | 66        |
| 4.6      | Voraussetzungen einer erfolgreichen Prozessbewertung .....                | 67        |
| <b>5</b> | <b>Bewertung von Software-Technologien</b>                                | <b>69</b> |
| 5.1      | Einführung und Grundlegung .....                                          | 70        |
| 5.2      | Überblick über den Bewertungsablauf .....                                 | 71        |
| 5.3      | Analyse der Anwendungsdomäne .....                                        | 72        |
| 5.4      | Ermittlung des Technologiestatus .....                                    | 75        |
| 5.4.1    | Technologieanalyse .....                                                  | 76        |
| 5.4.2    | Marktanalyse .....                                                        | 80        |
| 5.5      | Dokumentation und Verwendung der Bewertungsergebnisse .....               | 81        |
| <b>6</b> | <b>Management von Verbesserungsprojekten</b>                              | <b>83</b> |
| 6.1      | Einführung .....                                                          | 83        |
| 6.2      | Vorgehensmodell .....                                                     | 84        |
| 6.2.1    | Projektinitiierung .....                                                  | 85        |
| 6.2.2    | Planung .....                                                             | 86        |
| 6.2.3    | Aufbereitung .....                                                        | 88        |
| 6.2.4    | Pilotanwendung .....                                                      | 89        |
| 6.2.5    | Breiteneinführung .....                                                   | 90        |

|                 |                                                                       |            |
|-----------------|-----------------------------------------------------------------------|------------|
| 6.3             | Projektorganisation.....                                              | 90         |
| 6.3.1           | Aufgaben der Unternehmensleitung.....                                 | 91         |
| 6.3.2           | Aufgaben und Eigenschaften des Projektleiters .....                   | 92         |
| 6.3.3           | Aufgaben und Eigenschaften der Team-Mitglieder .....                  | 93         |
| 6.4             | Steuerung, Kontrolle und Qualitätssicherung.....                      | 93         |
| 6.5             | Voraussetzungen erfolgreicher Verbesserungsprojekte.....              | 94         |
| <b>Teil II:</b> | <b>Hilfsmittel der Bewertung</b>                                      | <b>97</b>  |
| <b>7</b>        | <b>Modell zur Bewertung von Kernprozessen der Softwareentwicklung</b> | <b>99</b>  |
| 7.1             | Einführung.....                                                       | 99         |
| 7.2             | Bewertung von Kernprozessen des Softwaremanagements .....             | 100        |
| 7.2.1           | Projektorganisation.....                                              | 100        |
| 7.2.2           | Management externer Schnittstellen .....                              | 101        |
| 7.2.3           | Planung, Steuerung und Kontrolle .....                                | 102        |
| 7.2.4           | Konfigurations- und Änderungsmanagement.....                          | 103        |
| 7.2.5           | Technologiemanagement.....                                            | 103        |
| 7.3             | Bewertung von Kernprozessen der Softwarerealisierung.....             | 105        |
| 7.3.1           | Entwicklungsmethodik.....                                             | 105        |
| 7.3.2           | Requirements Engineering .....                                        | 106        |
| 7.3.3           | Architekturdefinition und Design.....                                 | 106        |
| 7.3.4           | Implementierung und Integration .....                                 | 107        |
| 7.3.5           | Qualitätssicherung: Review und Test.....                              | 108        |
| 7.4             | Der Faktor Mitarbeiter.....                                           | 109        |
| 7.4.1           | Qualifikation und Fertigkeit .....                                    | 110        |
| 7.4.2           | Motivation und Klima .....                                            | 111        |
| 7.4.3           | Arbeitsumfeld.....                                                    | 112        |
| 7.4.4           | Kommunikation und Zusammenarbeit .....                                | 112        |
| <b>8</b>        | <b>Metrikkatalog</b>                                                  | <b>115</b> |
| 8.1             | Einführung.....                                                       | 115        |
| 8.2             | Aufwands- und Kostenmetriken.....                                     | 118        |
| 8.3             | Zeitmetriken .....                                                    | 126        |
| 8.4             | Umfangsmetriken .....                                                 | 131        |
| 8.5             | Prozessqualitäts-Metriken .....                                       | 133        |
| 8.6             | Produktqualitäts-Metriken.....                                        | 145        |
| 8.7             | Geschäftsmetriken .....                                               | 154        |
| <b>9</b>        | <b>Beispiele zur Prozess- und Technologiebewertung</b>                | <b>157</b> |
| 9.1             | Einführung.....                                                       | 157        |

---

|           |                                                                          |            |
|-----------|--------------------------------------------------------------------------|------------|
| 9.2       | Dokumentation der Bewertungsergebnisse.....                              | 157        |
| 9.3       | Ergebnisse einer qualitativen Prozessanalyse und Ergebnisauswertung..... | 159        |
| 9.4       | Beschreibung und Bewertung einer Softwaretechnologie.....                | 169        |
| 9.5       | Beschreibung und Bewertung einer Prozesstechnologie.....                 | 175        |
| <b>10</b> | <b>Abschluss und Ausblick</b>                                            | <b>181</b> |
|           | <b>Begriffsverzeichnis</b>                                               | <b>185</b> |
|           | <b>Literaturverzeichnis</b>                                              | <b>191</b> |
|           | <b>Schlagwortverzeichnis</b>                                             | <b>201</b> |
